# Supplementary material for: NO x lifetimes and emissions of cities and power plants in polluted background estimated by satellite observations
Source: Copernicus journal article supplement (doi:10.5194/acp-16-5283-2016), 2016-04-28
Supplement: Supplementary file 1 [file acp-16-5283-2016-supplement.pdf]

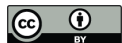

*Supplement of*

## **NO<sub>x</sub> lifetimes and emissions of cities and power plants in polluted background estimated by satellite observations**

**Fei Liu et al.**

*Correspondence to:* S. Beirle ([steffen.beirle@mpic.de](mailto:steffen.beirle@mpic.de)) and Q. Zhang ([qiangzhang@tsinghua.edu.cn](mailto:qiangzhang@tsinghua.edu.cn))

The copyright of individual parts of the supplement might differ from the CC-BY 3.0 licence.

## 1. Impact of interfering sources on a simple lifetime fit

In recent studies, the decay of  $\text{NO}_2$  downwind from strong  $\text{NO}_x$  emission sources was used to derive the  $\text{NO}_x$  lifetime. However, this method can be strongly affected by neighboring sources. In a case study, we investigated the effect of an interfering source 100 km downwind with 10% of the emission rate as the source of interest. If such an interference is not accounted for by the fitted model function (e.g. in Beirle et al., 2011), the fit tries to “explain” the downwind interference by a higher lifetime. In the example shown in Fig. S1, a 10% of interference results in a 20% longer lifetime.

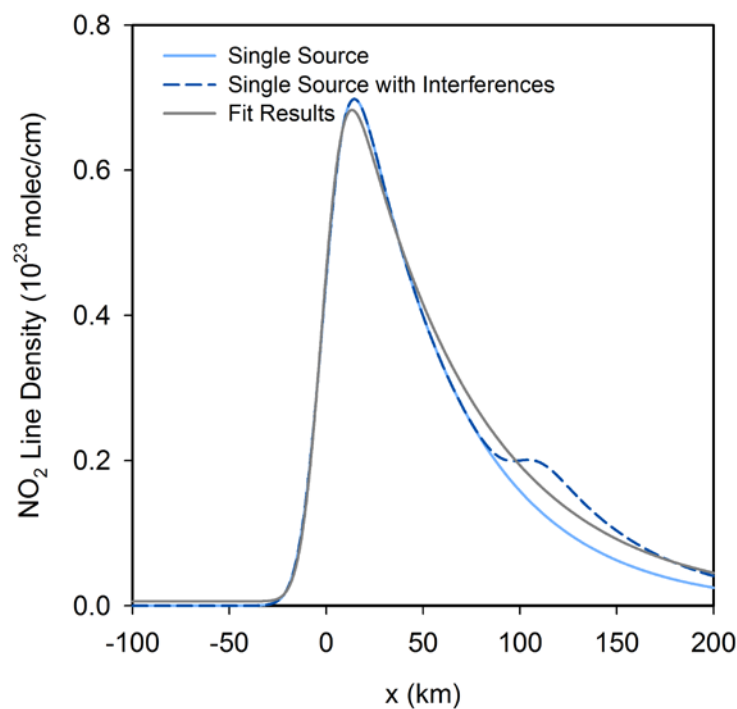

Figure S1. Sensitivity of the fitted lifetime to interferences. Solid blue line: synthetic line densities of a single source with emissions of 500 molec- $\text{NO}_2$ /s, assuming a pseudo first-order loss of  $\text{NO}_2$  for a a-priori lifetime of 3 hours and a wind speed of 5 m/s with a spatial smoothing following a Gaussian function with a standard deviation of 10 km; blue dash: line densities of the single source with an additional source with emissions of 50 molec- $\text{NO}_2$ /s at 100 km. Grey: lifetime fit based on  $M(x)$  (Eq. 1).

## 2. Investigated Locations

In this study, 24 power plants and 69 cities across China and the US are investigated, including 7 power plants and 16 cities located in mountainous regions, as listed in Table S2.

Table S2 Summary of power plants and cities investigated in this study.

| Category     | ID | Location          | Latitude | Longitude | Lifetime |                  |                 | Emission (mol/s) |           |
|--------------|----|-------------------|----------|-----------|----------|------------------|-----------------|------------------|-----------|
|              |    |                   |          |           | Value    | Num <sup>a</sup> | SD <sup>a</sup> | This Study       | Bottom-up |
| Power Plants | 1  | Shangdu           | 42.2     | 116.0     | 2.3      | 3                | 0.6             | 20               | 17        |
|              | 2  | Shimen            | 29.6     | 111.4     | 3.6      | 1                | -               | 7                | 8         |
|              | 3  | Tuoketuo          | 40.2     | 111.4     | 3.7      | 6                | 2.9             | 56               | 57        |
|              | 4  | Xinyang           | 32.1     | 114.1     | 3.3      | 5                | 1.2             | 8                | 11        |
|              | 5  | Xuzhou            | 34.4     | 117.3     | 5.4      | 3                | 4.0             | 63               | 58        |
|              | 6  | Yangcheng         | 35.5     | 112.6     | 7.5      | 3                | 4.1             | 30               | 24        |
|              | 7  | Colstrip          | 45.9     | -106.6    | 3.7      | 4                | 1.3             | 11               | 14        |
|              | 8  | Conemaugh         | 40.5     | -79.1     | 3.7      | 3                | 0.2             | 13               | 19        |
|              | 9  | Coronado          | 34.5     | -109.3    | 2.0      | 3                | 0.4             | 9                | 9         |
|              | 10 | Crystal River     | 29.0     | -82.7     | 3.1      | 6                | 1.2             | 13               | 16        |
|              | 11 | George Neal North | 42.3     | -96.4     | 2.5      | 5                | 0.8             | 15               | 11        |
|              | 12 | Harlee Branch     | 33.2     | -83.3     | 4.4      | 5                | 1.6             | 12               | 12        |
|              | 13 | Hunter            | 39.3     | -111.1    | 2.1      | 4                | 0.6             | 29               | 19        |
|              | 14 | Joppa Steam       | 37.2     | -88.9     | 3.4      | 7                | 1.4             | 12               | 15        |
|              | 15 | Laramie River     | 42.1     | -104.9    | 1.9      | 3                | 0.3             | 16               | 11        |
|              | 16 | Powerton          | 40.6     | -89.6     | 3.9      | 6                | 1.1             | 11               | 13        |
|              | 17 | Rockport          | 37.9     | -87.0     | 3.3      | 5                | 0.7             | 19               | 16        |
| Cities       | 18 | Pingdingshan      | 33.7     | 113.2     | 4.2      | 3                | 1.6             | 69               | 46        |
|              | 19 | Changchun         | 43.9     | 125.4     | 3.8      | 5                | 0.8             | 37               | 94        |

---

|    |           |      |       |     |   |     |     |     |
|----|-----------|------|-------|-----|---|-----|-----|-----|
| 20 | Changsha  | 27.9 | 113.0 | 3.5 | 4 | 0.7 | 39  | 51  |
| 21 | Changzhi  | 36.3 | 113.2 | 3.4 | 2 | 0.9 | 65  | 42  |
| 22 | Chongqing | 29.5 | 106.3 | 3.2 | 1 | -   | 88  | 44  |
| 23 | Dalian    | 39.0 | 121.8 | 5.1 | 4 | 1.2 | 41  | 60  |
| 24 | Daqing    | 46.6 | 125.1 | 3.8 | 5 | 0.8 | 26  | 88  |
| 25 | Hangzhou  | 30.2 | 120.4 | 4.3 | 4 | 1.5 | 60  | 69  |
| 26 | Harbin    | 45.8 | 126.7 | 3.5 | 5 | 0.6 | 58  | 72  |
| 27 | Huainan   | 32.7 | 117.0 | 5.2 | 5 | 1.8 | 41  | 52  |
| 28 | Jinan     | 36.9 | 117.9 | 6.4 | 1 | -   | 181 | 79  |
| 29 | Jiujiang  | 29.8 | 116.0 | 2.7 | 3 | 0.0 | 33  | 27  |
| 30 | Kunming   | 25.0 | 102.8 | 3.9 | 2 | 0.9 | 23  | 50  |
| 31 | Linyi     | 35.1 | 118.3 | 5.3 | 5 | 2.3 | 16  | 40  |
| 32 | Liuzhou   | 24.3 | 109.4 | 2.8 | 2 | 0.9 | 26  | 31  |
| 33 | Nanning   | 22.8 | 108.4 | 3.7 | 3 | 2.8 | 10  | 20  |
| 34 | PRD       | 22.8 | 113.5 | 3.7 | 3 | 0.4 | 433 | 493 |
| 35 | Qingdao   | 36.1 | 120.2 | 4.2 | 2 | 4.3 | 70  | 76  |
| 36 | Qiqihar   | 47.2 | 123.6 | 4.3 | 4 | 1.4 | 20  | 27  |
| 37 | Shanghai  | 31.3 | 121.5 | 4.7 | 4 | 1.4 | 322 | 271 |
| 38 | Tangshan  | 39.7 | 118.2 | 3.9 | 3 | 0.6 | 162 | 141 |
| 39 | Tianjin   | 39.1 | 117.3 | 3.7 | 4 | 0.5 | 145 | 100 |
| 40 | Tonghua   | 41.8 | 126.0 | 3.6 | 3 | 1.2 | 16  | 15  |
| 41 | Wuhan     | 30.6 | 114.3 | 2.6 | 4 | 0.8 | 185 | 130 |
| 42 | Xiamen    | 24.5 | 118.1 | 3.4 | 1 | -   | 89  | 72  |
| 43 | Xiangyang | 32.0 | 112.1 | 2.9 | 1 | -   | 41  | 39  |
| 44 | Yinchuan  | 38.5 | 106.2 | 3.5 | 5 | 0.9 | 33  | 28  |
| 45 | Yueyang   | 29.4 | 113.1 | 2.6 | 5 | 2.1 | 28  | 24  |
| 46 | Zhanjiang | 21.3 | 110.3 | 3.7 | 3 | 0.7 | 11  | 22  |

---

|              |              |          |        |       |     |     |     |     |    |
|--------------|--------------|----------|--------|-------|-----|-----|-----|-----|----|
| 47           | Atlanta      | 33.8     | -84.4  | 5.1   | 4   | 3.7 | 29  | 35  |    |
| 48           | Chicago      | 41.8     | -87.7  | 3.9   | 8   | 1.4 | 209 | 92  |    |
| 49           | Cincinnati   | 39.1     | -84.6  | 4.2   | 5   | 1.3 | 43  | 22  |    |
| 50           | Cleveland    | 41.5     | -81.7  | 4.6   | 6   | 3.4 | 11  | 33  |    |
| 51           | Columbus     | 40.0     | -83.1  | 5.6   | 4   | 1.5 | 7   | 22  |    |
| 52           | Dallas       | 32.9     | -97.0  | 3.9   | 4   | 0.7 | 77  | 39  |    |
| 53           | Detroit      | 42.4     | -83.1  | 4.5   | 6   | 2.6 | 100 | 61  |    |
| 54           | Houston      | 29.8     | -95.3  | 3.5   | 4   | 0.9 | 78  | 50  |    |
| 55           | Indianapolis | 39.8     | -86.2  | 4.7   | 3   | 2.4 | 17  | 21  |    |
| 56           | Jacksonville | 30.5     | -81.6  | 3.2   | 5   | 1.1 | 23  | 30  |    |
| 57           | Kansas City  | 39.2     | -94.6  | 3.5   | 2   | 0.1 | 32  | 27  |    |
| 58           | Memphis      | 35.1     | -90.1  | 3.0   | 3   | 0.7 | 11  | 21  |    |
| 59           | Miami        | 26.0     | -80.2  | 4.7   | 2   | 0.1 | 39  | 36  |    |
| 60           | Minneapolis  | 45.0     | -93.3  | 3.8   | 5   | 0.7 | 62  | 44  |    |
| 61           | Montreal     | 45.6     | -73.7  | 2.5   | 4   | 0.9 | 59  | 59  |    |
| 62           | New Orleans  | 30.1     | -90.3  | 4.9   | 6   | 2.3 | 15  | 14  |    |
| 63           | New York     | 40.7     | -73.5  | 4.4   | 5   | 0.9 | 247 | 311 |    |
| 64           | Omaha        | 41.3     | -96.1  | 2.0   | 5   | 1.4 | 32  | 25  |    |
| 65           | Orlando      | 28.5     | -81.3  | 3.5   | 5   | 1.0 | 24  | 25  |    |
| 66           | Philadelphia | 40.0     | -75.2  | 4.4   | 5   | 1.2 | 55  | 65  |    |
| 67           | San Antonio  | 29.6     | -98.5  | 3.4   | 3   | 0.5 | 20  | 16  |    |
| 68           | St Louis     | 38.7     | -90.4  | 3.7   | 5   | 1.2 | 56  | 36  |    |
| 69           | Tampa        | 27.9     | -82.4  | 3.7   | 6   | 1.6 | 39  | 28  |    |
| 70           | Tucson       | 32.3     | -110.9 | 1.8   | 3   | 0.5 | 21  | 11  |    |
| Mountainous  | 71           | Daba     | 38.0   | 105.9 | 3.5 | 4   | 1.2 | 86  | 24 |
| Power Plants | 72           | Jingyuan | 36.7   | 104.8 | 1.6 | 2   | 0.8 | 14  | 19 |
|              | 73           | Shentou  | 39.4   | 112.6 | 2.9 | 3   | 0.2 | 73  | 52 |

|                       |    |                |      |        |     |   |     |     |     |
|-----------------------|----|----------------|------|--------|-----|---|-----|-----|-----|
|                       | 74 | Cholla         | 34.9 | -110.3 | 1.9 | 1 | -   | 21  | 8   |
|                       | 75 | Four Corners   | 36.8 | -108.4 | 2.2 | 2 | 0.5 | 83  | 44  |
|                       | 76 | Intermountain  | 39.5 | -112.6 | 2.1 | 5 | 0.8 | 39  | 19  |
|                       | 77 | Navajo         | 36.9 | -111.4 | 3.1 | 3 | 0.8 | 18  | 22  |
|                       | 78 | Baotou         | 40.6 | 109.8  | 4.3 | 7 | 3.4 | 94  | 82  |
|                       | 79 | Beijing        | 39.8 | 116.3  | 2.5 | 4 | 0.9 | 252 | 109 |
|                       | 80 | Chifeng        | 42.3 | 119.3  | 2.5 | 5 | 0.9 | 26  | 25  |
|                       | 81 | Datong         | 40.1 | 113.3  | 3.3 | 3 | 0.4 | 106 | 70  |
|                       | 82 | Hohhot         | 40.8 | 111.7  | 4.1 | 6 | 3.1 | 26  | 38  |
|                       | 83 | Lanzhou        | 36.1 | 103.8  | 2.0 | 1 | -   | 35  | 47  |
|                       | 84 | Shijiazhuang   | 38.1 | 114.5  | 4.0 | 2 | 0.6 | 261 | 72  |
| Mountainous<br>Cities | 85 | Taiyuan        | 37.6 | 112.4  | 2.9 | 2 | 1.5 | 180 | 78  |
|                       | 86 | Wenzhou        | 28.0 | 120.7  | 7.9 | 1 | -   | 18  | 46  |
|                       | 87 | Zhangjiakou    | 40.8 | 114.8  | 2.4 | 3 | 0.7 | 64  | 43  |
|                       | 88 | Denver         | 39.8 | -105.0 | 2.6 | 1 | -   | 78  | 47  |
|                       | 89 | Las Vegas      | 36.2 | -115.2 | 1.7 | 3 | 0.1 | 68  | 31  |
|                       | 90 | Phoenix        | 33.6 | -112.0 | 1.3 | 2 | 1.0 | 138 | 36  |
|                       | 91 | Portland       | 45.5 | -122.6 | 2.8 | 1 | -   | 73  | 33  |
|                       | 92 | Salt Lake City | 40.7 | -112.0 | 1.9 | 3 | 1.1 | 87  | 20  |
|                       | 93 | Seattle        | 47.4 | -122.3 | 1.4 | 1 | -   | 232 | 29  |

<sup>a</sup>Num: the number of fits for wind direction sectors with a good fit performance; SD: the standard deviation of fits for wind direction sectors with a good fit performance.

### 3. Uncertainties

We here investigate the different sources of uncertainties contributing to the overall uncertainties of the derived lifetimes and emissions. For both  $\tau$  and emissions, the choice of integration and fit intervals (a), confidence intervals and variability of fit results (b), and wind fields (c) contribute to the uncertainties. In addition, uncertainties in the total NO<sub>2</sub> mass fit (d), tropospheric NO<sub>2</sub> TVCDs (e) and the NO<sub>2</sub>/NO<sub>x</sub> ratio (f) affect the derived emissions. In (g), we discuss potential errors due to the assumption of having a single effective lifetime.

#### (a) Choice of integration and fit intervals

Analogue to Beirle et al. (2011), we investigate the impact of the a-priori choice of integration and fit intervals. The fitted  $\tau$  is generally robust with respect to changes of the fit interval  $f$  and integration interval  $i$  for the calculation of  $C(x)$  in  $N(x)$ , associated with the good representation of the emission pattern provided by the NO<sub>2</sub> distribution under calm wind condition  $C(x)$  in any case. A change of  $f$  and  $i$  by  $\pm 100$  km affects the resulting lifetimes by only about 10%. The dependency of the fit results for  $\tau$  and emissions on the fit and integration intervals and choice of wind fields are tabulated in Table S1.

#### (b) Fit errors

The fit errors expressed as 95% confidence interval (CI) are derived from the least-squares fit routine directly for individual sources. They are typically of the order of 30% for  $\tau$  and 20% for  $A$ , respectively. In addition, for  $\tau$ , the standard mean error of fitted lifetimes for all wind direction sectors is regarded as a measure of uncertainty to reflect the reliability of lifetimes. But for 5 sites, the fit of  $\tau$  can only work for a single direction and not allow for statistical analysis. We thus average the standard deviation of  $\tau$  for all available sites, yielding 40%, and calculate the lifetime uncertainty as standard mean error (i.e.,  $40\%/\sqrt{n}$ ), with  $n$  being the number of available wind directions., i.e. 20% if 4 wind directions are available).

#### (c) Wind fields

The accuracy of wind fields affects our analysis twofold, by sorting the NO<sub>2</sub> TVCDs according to wind directions as well as by transferring the fitted e-folding distance into a lifetime. We choose ECMWF wind fields averaged from ground up to 500 m and a threshold of 2 m/s for calm winds in this study. Uncertainties due to the choice of layer height (e.g. 200 m or 1000 m) are comparable with Beirle et al. (2011): the resulting lifetimes/emissions

change about 10% on average. We also investigate the dependency on the choice of the threshold for calm wind. The threshold of 2 m/s was found to be a good compromise of sufficient sample size for both the calculation of line densities for calm as well as for windy conditions. It successfully worked out for 70 non-mountainous sites, while for both lower and higher thresholds (of e.g. 1 m/s and 3 m/s), several sites are discarded, due to low sample sizes for calm (implying a bad representation of the emission pattern) and noisy downwind patterns, respectively. Thus we consider that the threshold of 2 m/s is optimal in this study.

In addition, we carried out a comparison of wind information between ECMWF and sounding measurements (Table S3). Here we focus on the comparison of the quantity used for the lifetime estimate, i.e. the projected wind components for each wind direction sector. We firstly sorted ECMWF wind fields for the years 2005–2013 into 8 wind direction sectors and classified the simultaneous sonde data into the same wind direction sector, and then calculate the mean of the projected wind speeds from both datasets to compare. While *total* wind speeds from ECMWF and sonde measurements agree quite well (~5% on average for wind speeds > 2 m/s), the *projected* wind components are systematically higher for ECMWF. This can be expected, as ECMWF wind fields are the basis for the wind direction classification. If, for instance, the true wind would be 5 m s<sup>-1</sup> from north, but the model wind is 5 m s<sup>-1</sup> from east, the case is classified as easterly, while the actual easterly wind component is 0. That is, deviations of the wind direction (even if 0 on average) cause a systematic bias due to this projection procedure. Thus, the deviation of the projected wind speeds reflects uncertainties of the sorting procedure caused by deviations of the wind direction, and allows for an estimate of the overall uncertainty due to wind fields. The deviations for non-mountainous sites are, on average, acceptable (26%). Note also that de Foy et al. (2015) report on ERA-Interim winds yielding a better lifetime estimate compared to the North American Regional Reanalysis project (NARR). For mountainous sites, however, significantly higher deviations are found (37% on average) due to insufficient spatial resolution of ECMWF (see also Sect. 2.6 of the manuscript).

Wind fields often reveal systematic spatio-temporal patterns, such as diurnal cycles or land-sea transitions, which could have systematic effects on our results. As the underlying physical processes are included in the models, these effects should, in first order, be accounted for by ECMWF. However, the spatial resolution might be too coarse to capture these effects completely.



Beirle et al. (2011) varied the time of the wind data used for the fit and found changes below 10%. In addition, from the comparison with sonde data, we see no indication that ECMWF data are particularly biased for coastal cities (Miami, Xiamen). We thus consider the uncertainties caused by diurnal cycles of wind speeds or land-sea transitions to be covered by the estimated overall uncertainty related to wind fields.

Overall, we estimate the uncertainties associated with the wind data as 30% for non-mountainous sites.

#### (d) Fit of the total NO<sub>2</sub> mass

The emission estimate is based on the spatially integrated NO<sub>2</sub> VCD above background (Eq. (5)). The integration interval aligned in the wind direction  $h$  and fit interval aligned in the across-wind direction  $v$  (see Fig. S2) was chosen in order to allow a robust fit of the total NO<sub>2</sub> mass on top of the background. If  $h$  and  $v$  are chosen too small, emissions are underestimated caused by the loss of part of the NO<sub>2</sub> TVCDs from the source of interest; while, if  $h$  and  $v$  are chosen too large, interferences from surroundings are included and the derived emissions are not from the target source, but from a larger area (compare the next section). The fitted emissions are rather insensitive to the change of  $v$ , because possible losses by cross-wind dilution are accounted for by scaling the integrated NO<sub>2</sub> mass according to the fitted width of the Gaussian plume. The resulting emissions change about 5% on average when  $v$  is increased by 50%. If the fit interval  $h$  is increased by 50% as well, the emissions for fewer sites (66 sites) can be estimated, related to the enhanced interferences corresponding to larger  $h$  which cannot be simply interpreted by linear background (i.e.,  $\varepsilon_i + \beta_i x$  in Eq. (5)), thus justifying the choice of  $h$  as reasonable. The fitted emissions are also found to be not very sensitive to the choice of  $h$ :  $A$  increases by only ~20% when  $h$  increases by 150%. We estimate the uncertainties due to the fit of the total NO<sub>2</sub> mass as 20%, and apply this number to all considered sources.

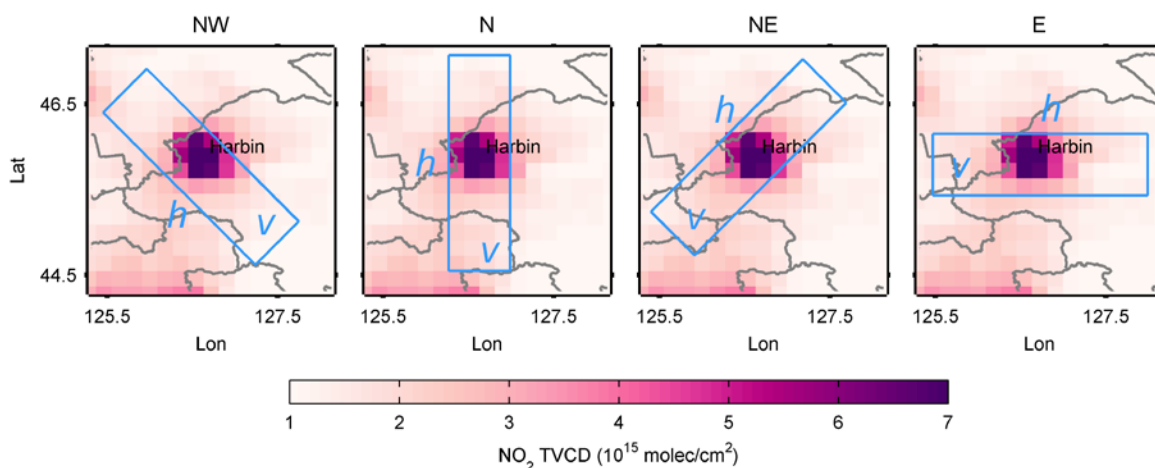

Figure S2. The intervals chosen for the fit of total NO<sub>2</sub> mass for northwest, north, northeast and east directions (from left to right). The mean calm NO<sub>2</sub> TVCDs are integrated over interval *v* to calculate line densities and the fit is performed over the interval *h* (see Sect. 2.2.3).

### (e) Tropospheric NO<sub>2</sub> TVCDs

The uncertainty of TVCDs consists of additive (biases due to the spectral retrieval and the stratospheric correction) and multiplicative terms (tropospheric AMFs). For our study, any additive bias is eliminated by the fitted background, while the uncertainty of the tropospheric AMF of about 30% (Boersma et al., 2007, table 2 therein) directly propagates to the uncertainty of the estimated emissions. Note that this is a quite conservative estimate, as all statistical error components are strongly suppressed in this analysis due to the consideration of multiannual means.

The retrievals of NO<sub>2</sub> TVCDs performed by KNMI (used in this study) and NASA (OMI “Standard Product”) are based on the same spectral analysis, but differ in the separation of stratospheric and tropospheric columns and AMF calculations (Bucsela et al., 2013; Boersma et al., 2011; Boersma et al., 2007; Dirksen et al., 2011), which resulted in some significant differences in their early released products (Lamsal et al., 2010; Platt and Stutz, 2008). With the development of NO<sub>2</sub> retrieval algorithms, however, the two products are increasingly converging (Bucsela et al., 2013; Boersma et al., 2011).

Though the recent update of the DOMINO algorithm (Boersma et al., 2011) has improved some issues related to the spatial resolution of external databases, retrievals are still based on relatively coarsely resolved terrain height, ground albedo, and a-priori NO<sub>2</sub> vertical profile shape, probably causing low-biased VCDs over strong emission sources (e.g., Russell et al., 2011). These effects are, however, covered by the assumed uncertainty of TVCDs of 30%.

Recently, an overall bias of the OMI NO<sub>2</sub> column density has been reported, which turns out to be related to an imperfect spectral analysis and could be removed by improved spectral fitting procedures (van Geffen et al., 2015; Marchenkov et al., 2015). Unfortunately, the updated datasets are not available yet.

However, as an overall bias in total columns is mostly removed by the stratospheric correction procedures, we do not expect a large effect on the tropospheric NO<sub>2</sub> column densities over polluted sites, and thus no impact on our emission estimates.

In this study, only cloud-free NO<sub>2</sub> TVCDs are used for fitting lifetimes and emissions, which do not represent the average level for all days due to the accelerated photochemistry and different meteorological conditions (e.g. boundary layer height, atmospheric transport) under clear sky conditions. But still the emission estimates are appropriate, as both the NO<sub>x</sub> lifetime and total mass derived from the NO<sub>2</sub> TVCDs are derived consistently, both of which reflect the values under clear sky conditions. Thus, this effect is of minor importance for this study and is not expected to bias the estimates of NO<sub>x</sub> emissions.

(f) The NO<sub>x</sub>/NO<sub>2</sub> ratio

The derived emissions in terms of NO<sub>2</sub> are upscale to NO<sub>x</sub> based on a constant NO<sub>x</sub>/NO<sub>2</sub> ratio of 1.3, representing “typical urban conditions and noontime sun” (Sect. 6.5.1 of Seinfeld and Pandis, 2006). Note that conditions are quite consistent in this study due to the overpass time of OMI close to noon, the selection of cloud-free observations, the focus on the ozone season, and the focus on polluted regions with generally high tropospheric ozone. In addition, we have checked the NO<sub>x</sub>/NO<sub>2</sub> ratio at OMI overpass time within the boundary layer (up to 2 km) with the CTM EMAC (Jöckel et al., 2015) and found values of  $1.28 \pm 0.08$  for polluted (NO<sub>x</sub> >  $1 \times 10^{15}$  molec/cm<sup>2</sup>) regions in China and the US for the 1<sup>st</sup> of July 2005, and similar values for all days of the ozone season (on average  $1.32 \pm 0.06$ ).

However, the NO/NO<sub>2</sub> ratio of course might differ locally, in particular when the difference in O<sub>3</sub> concentrations between upwind and downwind plumes is significant. But the influence is not dramatic on the scales of the OMI footprint (at least 13 km × 24 km). In addition, the influence has been included in the overall uncertainty estimates by averaging the fit results for different wind direction sectors that usually represent different levels of incoming O<sub>3</sub>. We consider the applied correction (with an assumed uncertainty of 10%), to be adequately represented by the CTM, reflecting the mean conditions over spatial scales of ~100–200 km.

(g) General approach

In this study, we assumed that the removal of  $\text{NO}_2$  can be simply described by a first order loss, and thus the chemical decay of  $\text{NO}_2$  follows an exponential decay function  $e(x)$  (Eq. 2) with an e-folding distance  $x_0$ , which yields an overall, effective lifetime  $\tau$ . From the very good lifetime fit performance, we see no indications that this assumption is insufficient. In Beirle et al. (2014), it was investigated how far the estimated lifetime by a similar approach might be biased in case of temporal fluctuations of both emissions and instantaneous lifetimes. The impact of such fluctuations was found to be rather small.

In Eq. (4), it is implicitly assumed that the lifetime is the same for calm and windy conditions. We thus checked the mean  $\text{NO}_2$  TVCDs for calm and windy conditions and find small (<10%), but systematic differences (Fig. S5), which are likely related to changes in lifetimes under different wind conditions. Valin et al. (2013) argue that higher wind speeds cause faster dilution of  $\text{NO}_x$ , leading to longer lifetimes. This effect could contribute to the observed larger  $\text{NO}_2$  TVCDs under windy conditions compared to calm wind conditions. However, it is interesting to note that for some sites,  $\text{NO}_2$  TVCDs are also larger under calm wind conditions. A better understanding of the dependence of  $\text{NO}_2$  column densities on wind conditions thus probably requires the consideration of various parameters influencing the  $\text{NO}_x$  chemistry. The effect is rather small (less than 10% on average, see Fig. S5), we thus estimate the uncertainties due to the potential dependence of lifetimes (and other factors) on wind conditions as 10%.

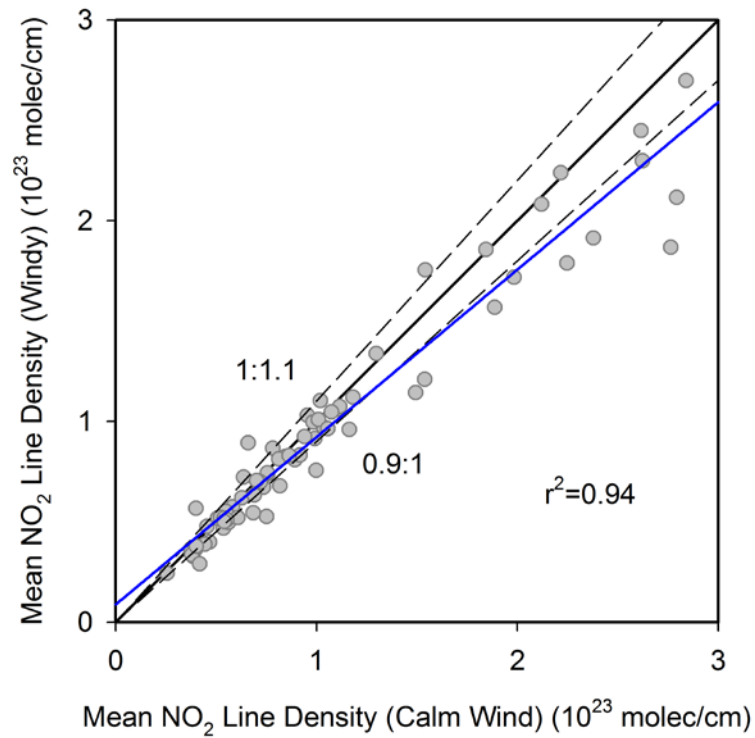

Figure S5. Scatterplot of mean NO<sub>2</sub> line densities under calm wind condition versus under windy condition. NO<sub>2</sub> line densities (integration interval: 300 km) for non-mountainous power plants and cities are averaged over the fit interval (600 km). Only those wind directions are included for which the fit works properly. The blue line represents the fitted regression line with a slope of 0.8 and an intercept of 0.1. The ratio of mean NO<sub>2</sub> line density under windy wind condition to that under calm wind condition is 0.9.

Table S1. The mean relative change of resulting lifetime  $\tau$  and emission  $E$  for different choices of fit and integration intervals, and wind fields.

|                                            | $f+100$ | $f-100$ | $i+100$ | $i-100$ | $h \times 150\%$ | $v \times 150\%$ | $\leq 1 \text{ m/s}^a$ | $\leq 3 \text{ m/s}^a$ | $200\text{m}^b$ | $1000\text{m}^b$ |
|--------------------------------------------|---------|---------|---------|---------|------------------|------------------|------------------------|------------------------|-----------------|------------------|
| mean $[(\Delta \tau) / \tau]$              | -2%     | -4%     | 7%      | 8%      | —                | —                | -5%                    | 2%                     | 7%              | -8%              |
| mean $[(\Delta \tau)] / \text{mean}[\tau]$ | -4%     | -4%     | 6%      | 5%      | —                | —                | -9%                    | 2%                     | 7%              | -9%              |
| mean $[(\Delta \tau)]$                     | -0.2    | -0.2    | 0.2     | 0.2     | —                | —                | -0.3                   | 0.1                    | 0.3             | -0.4             |
| mean $[(\Delta E) / E]$                    | 7%      | 8%      | -2%     | 2%      | 14%              | 1%               | 7%                     | 0%                     | -5%             | 13%              |
| mean $[(\Delta E)] / \text{mean}[E]$       | 5%      | 5%      | -3%     | 12%     | 22%              | 6%               | 0%                     | -1%                    | -3%             | 11%              |
| mean $[(\Delta E)]$                        | 3.4     | 3.3     | -2.2    | 7.3     | 13.2             | 0.6              | -0.2                   | -0.5                   | -2.0            | 6.0              |
| $N^c$                                      | 69      | 70      | 69      | 69      | 66               | 69               | 19                     | 64                     | 67              | 69               |

<sup>a</sup>definition of calm wind

<sup>b</sup>the height that ECMWF wind fields averaged from ground up to

<sup>c</sup>the number of sources for which the modified method in this study can work out

Table S3. Comparison of average wind speeds for years 2005–2013 for available cities from ECMWF and sounding measurements assembled by University of Wyoming.

| City                  | Projected Speed (m/s) <sup>a</sup> |          | Percent Difference <sup>b</sup> | r <sup>2</sup> | Unprojected Speed (m/s) <sup>a</sup> |          | Percent Difference <sup>b</sup> | Elevation Difference (m) <sup>c</sup> |
|-----------------------|------------------------------------|----------|---------------------------------|----------------|--------------------------------------|----------|---------------------------------|---------------------------------------|
|                       | ECMWF                              | Sounding |                                 |                | ECMWF                                | Sounding |                                 |                                       |
| Miami                 | 4.8                                | 4.0      | +15%                            | 0.59           | 4.9                                  | 4.5      | +7%                             | 0                                     |
| Harbin                | 7.0                                | 5.6      | +20%                            | 0.67           | 7.1                                  | 6.3      | +11%                            | -6                                    |
| Wuhan                 | 4.6                                | 3.2      | +31%                            | 0.63           | 4.7                                  | 4.5      | +3%                             | 25                                    |
| Omaha                 | 7.8                                | 6.4      | +18%                            | 0.77           | 8.0                                  | 7.0      | +12%                            | 33                                    |
| Kunming               | 7.0                                | 5.0      | +28%                            | 0.72           | 7.1                                  | 6.1      | +15%                            | 36                                    |
| Changsha              | 4.9                                | 2.8      | +43%                            | 0.61           | 4.9                                  | 4.4      | +12%                            | 73                                    |
| Xiamen                | 6.2                                | 5.0      | +19%                            | 0.65           | 6.3                                  | 5.7      | +8%                             | 77                                    |
| Chongqing             | 3.9                                | 2.2      | +43%                            | 0.30           | 4.0                                  | 3.7      | +7%                             | 85                                    |
| Non-mountainous cites | 5.8                                | 4.3      | +26%                            | 0.62           | 5.9                                  | 5.3      | +10%                            | 40                                    |
| Chifeng               | 5.8                                | 3.3      | +43%                            | 0.42           | 5.9                                  | 4.7      | +21%                            | 273                                   |
| Phoenix               | 3.6                                | 3.0      | +18%                            | 0.19           | 3.7                                  | 4.6      | -25%                            | 315                                   |
| Beijing               | 4.5                                | 3.9      | +14%                            | 0.56           | 4.6                                  | 5.1      | -10%                            | 319                                   |
| Lanzhou               | 4.7                                | 2.4      | +48%                            | 0.41           | 4.7                                  | 3.9      | +16%                            | 416                                   |
| Salt Lake City        | 4.0                                | 2.8      | +29%                            | 0.30           | 4.0                                  | 4.5      | -13%                            | 479                                   |
| Taiyuan               | 4.9                                | 2.5      | +49%                            | 0.42           | 4.7                                  | 4.3      | +9%                             | 410                                   |
| Denver                | 3.5                                | 1.8      | +50%                            | 0.12           | 3.6                                  | 3.9      | -9%                             | 637                                   |
| Mountainous cites     | 4.4                                | 2.8      | +37%                            | 0.35           | 4.5                                  | 4.4      | +1%                             | 429                                   |

<sup>a</sup>Average of wind speeds (>2 m/s) for each wind direction sector (see Sect.2.6 for detail)

<sup>b</sup>Percent Difference = (speed in ECWFMF - speed in sounding) / speed in ECWFMF

<sup>c</sup>Elevation Difference = elevation in ECWFMF - elevation in GTOPO

#### 4. Impact of distances between sources on fitted emissions

As for the distance between sources, we find that it is not critical for the fit of lifetime, as the actual distribution of sources is appropriately accounted for by  $C(x)$ . But for the fit of the total mass, a decision of the extent of the source under investigation has to be made. Here, we define the extent of the city to be  $\pm 20$  km and integrate the calm VCDs in across-wind direction over this interval. Thus, any interference within 20 km will automatically be assigned to the source of interest.

We performed a sensitivity analysis to investigate the effect of the distance between sources on the estimate of emissions. We simulated the line densities of a single source with emissions of 500 molec-NO<sub>2</sub>/s and with an additional source with emissions of 10%, 25% and 100% of the source of interest at 0–50 km distance, respectively, assuming an a-priori lifetime of 3 hours with a spatial smoothing following a Gaussian function with a standard deviation of 10 km. We then performed a non-linear least-squares fit of the modified Gaussian function  $g(x)$  (Eq. (5)) to the synthetic line densities, as illustrated in Fig. S7.

Generally, the fit cannot distinguish the source and the interference within 20 km, which tries to “explain” the interference by a larger emission. In the examples shown in Fig.S7, a 10%–100% of interference results in emission estimates which generally include the interfering source. From a distance of 30 km on, the performance of the fit gets more and more unstable, due to the interference. For distances of 40 km (and larger), the fit works properly again with a bias of less than 5% for most cases, and correctly separates the source of interest from the interfering source.

However, if the interference is comparably large as the source (500 molec-NO<sub>2</sub>), uncertainties are large. Thus, we conclude that our method generally is applicable for regional dominant sources within about a radius of 100 km. Interfering sources within 20 km cannot be separated, but will be included in the emission estimate. From 40 km on, interfering sources will not be included.



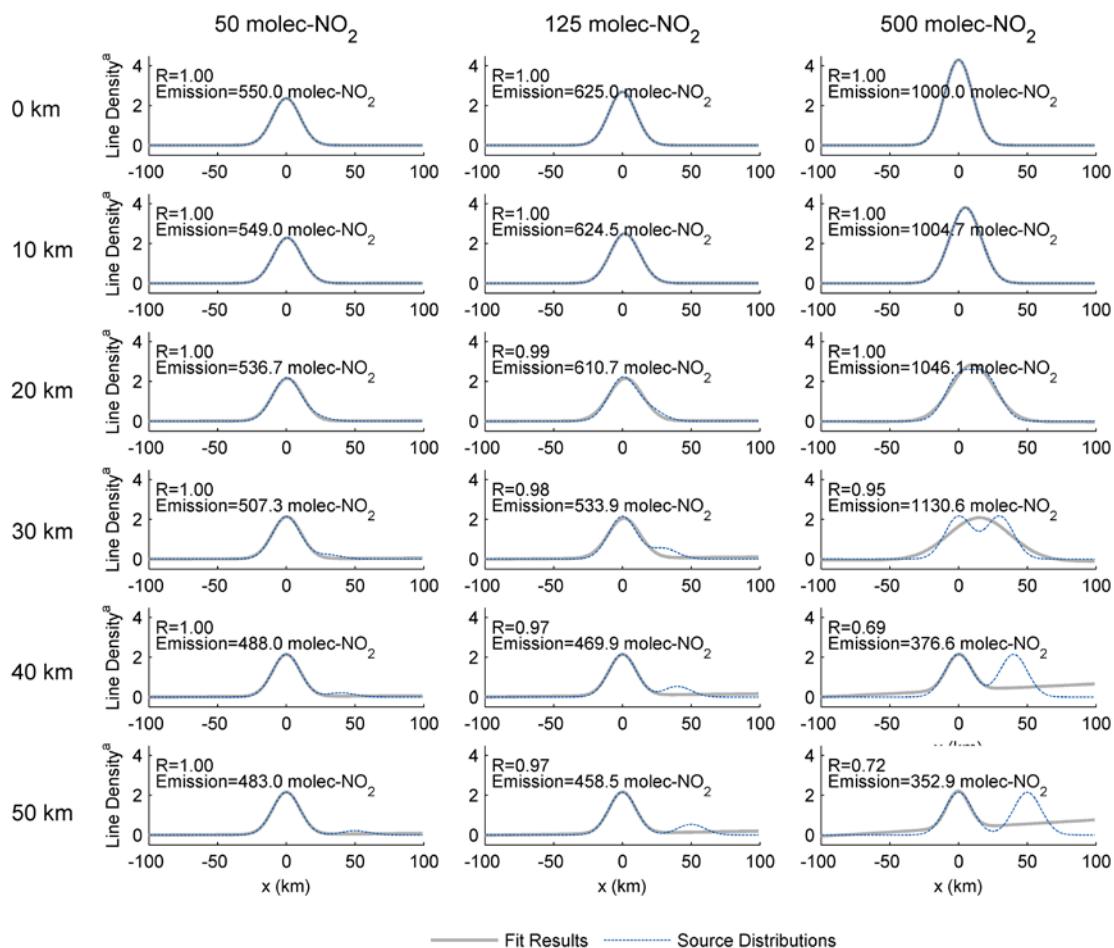

Figure S7. Sensitivity of the fitted emission to the distance between sources. Blue dot: synthetic line densities of a single source with emissions of 500 molec-NO<sub>2</sub>/s under calm wind condition and with an additional source with emissions of 50, 125 and 500 molec-NO<sub>2</sub>/s (from left to right) at 0–50 km (from top to bottom). Grey: emission fit based on  $g(x)$  (Eq. 5). The number indicates Emission resulting from the least-squares fit with 95% CI.

<sup>a</sup>Line Density: NO<sub>2</sub> line density ( $10^{23}$  molec/cm)

## 5. Potential applications for SO<sub>2</sub>

We have presented a method for the estimation of NO<sub>x</sub> lifetimes and emissions from space for strong sources on top of a generally polluted background.

Satellite observations of SO<sub>2</sub> have been used before for top-down estimates of emissions (e.g., Fioletov et al. (2011)) and even to obtain estimates of SO<sub>2</sub> lifetimes under special circumstances. Beirle et al. (2014) analyzed downwind plume evolution of SO<sub>2</sub> from the Kilauea volcano on Hawaii and estimated the respective SO<sub>2</sub> lifetime and emissions by a method similar to that proposed in Beirle et al. (2011) for NO<sub>2</sub>. In this special case, however, wind conditions were pretty stable, and only one main wind direction had to be considered, without any sorting, due to the prevailing trade winds.

For multiple sources in polluted background and variable wind conditions, however, the situation for SO<sub>2</sub> is much more complex than for NO<sub>2</sub>: The NO<sub>2</sub> observations are sorted according to the wind direction at the time of the measurement, while the “history” (i.e. the potential impact of NO<sub>x</sub> emissions from the previous day, transported under possibly different wind conditions) is not considered. While this is appropriate for NO<sub>2</sub> due to the lifetime of a few hours, this is fundamentally different for SO<sub>2</sub> with longer lifetimes, which causes considerably higher uncertainties due to changes of wind directions. In addition, also the across-wind integration (needed to compensate for spatial dilution) as well as the fit would have to be performed on larger intervals for longer lifetimes, such that nearby sources cannot be separated from each other anymore and the quantification of SO<sub>2</sub> emissions from an individual source would be more difficult.

Thus, it might be worth testing a similar method for SO<sub>2</sub>, but one has to be aware of the potential drawbacks, and we expect a higher uncertainty of resulting emissions as a consequence of the generally longer lifetime of SO<sub>2</sub>.

## Other Tables and Figures

Table S4. Topographic information of power plants and cities defined as mountainous sites.

| ID | Location       | Lifetime | Elevation in<br>GTOPO (m) | Elevation in<br>ECMWF (m) | Elevation<br>Difference (m) |
|----|----------------|----------|---------------------------|---------------------------|-----------------------------|
| 71 | Daba           | 3.5      | 1121                      | 1373                      | 252                         |
| 72 | Jingyuan       | 1.6      | 1491                      | 1824                      | 333                         |
| 73 | Shentou        | 2.9      | 1057                      | 1405                      | 348                         |
| 74 | Cholla         | 1.9      | 1548                      | 1838                      | 290                         |
| 75 | Four Corners   | 2.2      | 1628                      | 1918                      | 290                         |
| 76 | Intermountain  | 2.1      | 1420                      | 1671                      | 250                         |
| 77 | Navajo         | 3.1      | 1358                      | 1720                      | 362                         |
| 78 | Baotou         | 4.3      | 1043                      | 1331                      | 288                         |
| 79 | Beijing        | 2.5      | 40                        | 359                       | 319                         |
| 80 | Chifeng        | 2.5      | 481                       | 754                       | 273                         |
| 81 | Datong         | 3.3      | 1027                      | 1350                      | 323                         |
| 82 | Hohhot         | 4.1      | 1046                      | 1412                      | 366                         |
| 83 | Lanzhou        | 2.0      | 1743                      | 2159                      | 416                         |
| 84 | Shijiazhuang   | 4.0      | 76                        | 341                       | 265                         |
| 85 | Taiyuan        | 2.9      | 799                       | 1208                      | 410                         |
| 86 | Wenzhou        | 7.9      | 18                        | 329                       | 311                         |
| 87 | Zhangjiakou    | 2.4      | 738                       | 1203                      | 465                         |
| 88 | Denver         | 2.6      | 1610                      | 2247                      | 637                         |
| 89 | Las Vegas      | 1.7      | 638                       | 1031                      | 393                         |
| 90 | Phoenix        | 1.3      | 339                       | 654                       | 315                         |
| 91 | Portland       | 2.8      | 67                        | 364                       | 297                         |
| 92 | Salt Lake City | 1.9      | 1297                      | 1776                      | 479                         |
| 93 | Seattle        | 1.4      | 36                        | 369                       | 333                         |

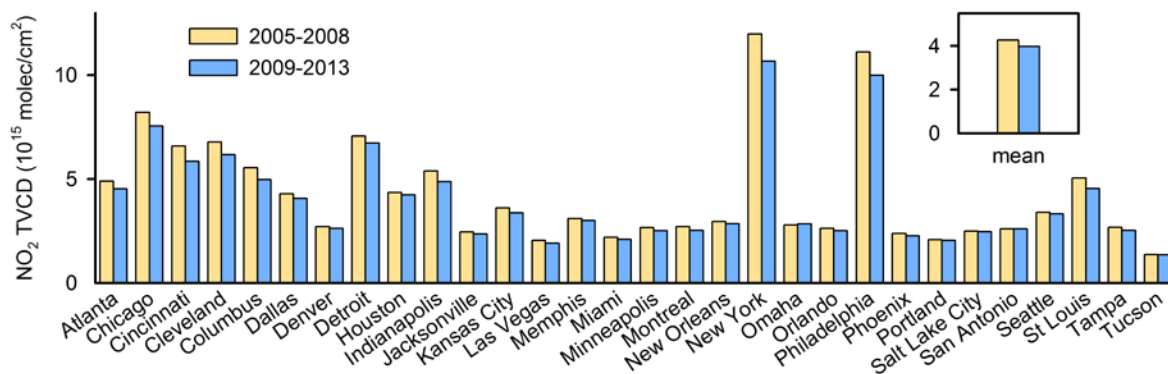

Figure S3. NO<sub>2</sub> TVCDs of investigated cities over the US. The yellow and blue bars denote the mean NO<sub>2</sub> TVCDs in a circle with a radius of 100 km around city centers for the ozone season during 2005–2008 and 2009–2013 respectively. The bars in the inset display the mean NO<sub>2</sub> TVCDs of cities shown.

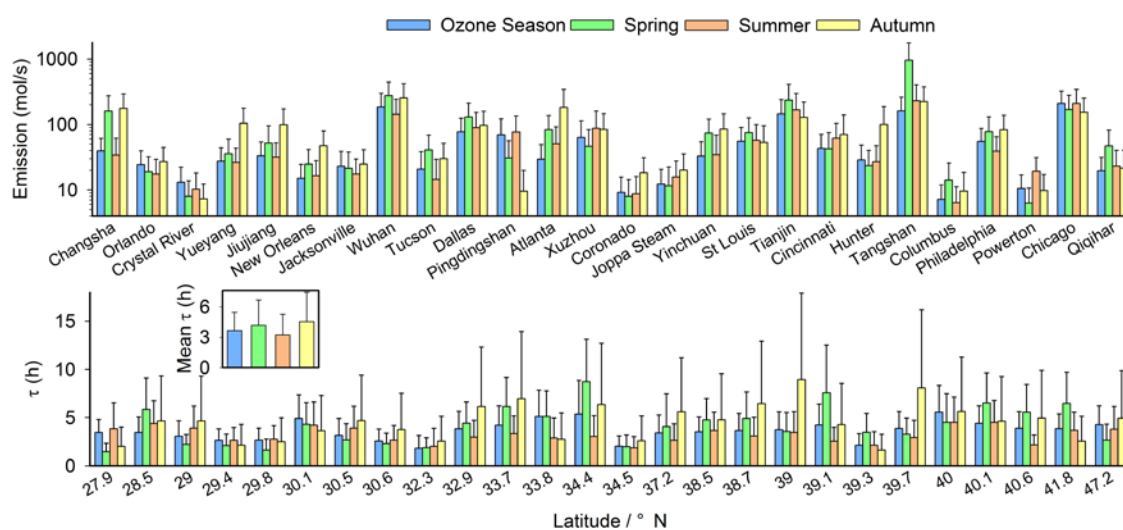

Figure S4. Seasonal mean NO<sub>x</sub> emissions and lifetimes. Mean daytime NO<sub>x</sub> emissions (top panel) and lifetimes (bottom panel) for the investigated sources (from south to north). The bars in the insets of the bottom panel display the average NO<sub>x</sub> lifetimes of sources shown for each season. Error bars show the uncertainties.

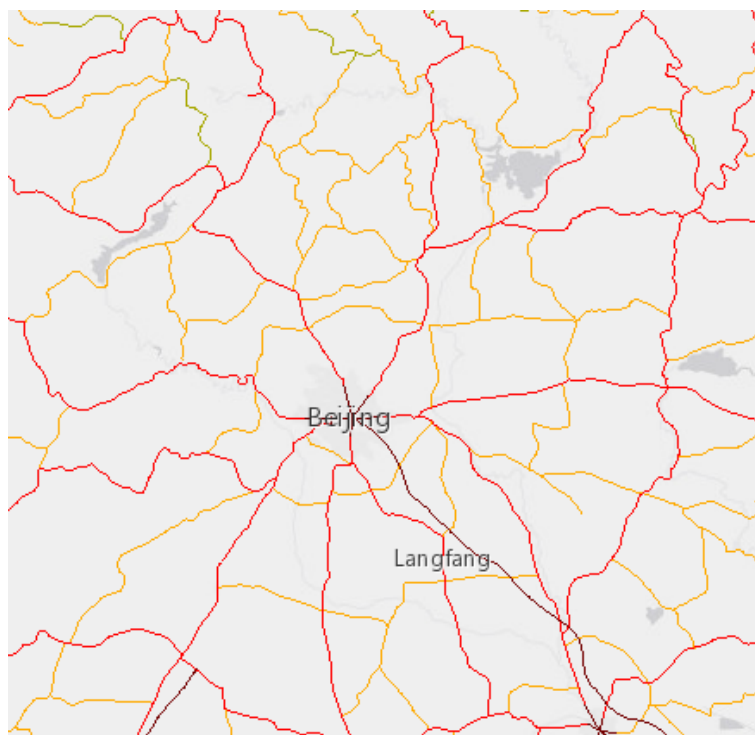

Figure S6. Road-network map of Beijing from the GRIP database. The map is a screen capture of the GRIP website ([http://geoservice.pbl.nl/website/flexviewer/index.html?config=cfg/PBL\\_GRIP.xml](http://geoservice.pbl.nl/website/flexviewer/index.html?config=cfg/PBL_GRIP.xml)).

## Reference

- Beirle, S., Boersma, K. F., Platt, U., Lawrence, M. G., and Wagner, T.: Megacity emissions and lifetimes of nitrogen oxides probed from space, *Science*, 333, 1737–1739, 2011.
- Beirle, S., Hörmann, C., Penning de Vries, M., Dörner, S., Kern, C., and Wagner, T.: Estimating the volcanic emission rate and atmospheric lifetime of SO<sub>2</sub> from space: a case study for Kīlauea volcano, Hawai'i, *Atmos. Chem. Phys.*, 14, 8309–8322, doi:10.5194/acp-14-8309-2014, 2014.
- Boersma, K. F., Eskes, H. J., Veefkind, J. P., Brinksma, E. J., van der A, R. J., Sneep, M., van den Oord, G. H. J., Levelt, P. F., Stammes, P., Gleason, J. F., and Bucsela, E. J.: Near-real time retrieval of tropospheric NO<sub>2</sub> from OMI, *Atmos. Chem. Phys.*, 7, 2103–2118, doi:10.5194/acp-7-2103-2007, 2007.
- Boersma, K. F., Eskes, H. J., Dirksen, R. J., van der A, R. J., Veefkind, J. P., Stammes, P., Huijnen, V., Kleipool, Q. L., Sneep, M., Claas, J., Leitão, J., Richter, A., Zhou, Y., and Brunner, D.: An improved tropospheric NO<sub>2</sub> column retrieval algorithm for the Ozone Monitoring Instrument, *Atmos. Meas. Tech.*, 4, 1905–1928, doi:10.5194/amt-4-1905-2011, 2011.
- Bucsela, E. J., Krotkov, N. A., Celarier, E. A., Lamsal, L. N., Swartz, W. H., Bhartia, P. K., Boersma, K. F., Veefkind, J. P., Gleason, J. F., and Pickering, K. E.: A new stratospheric and tropospheric NO<sub>2</sub> retrieval algorithm for nadir-viewing satellite instruments: applications to OMI, *Atmos. Meas. Tech.*, 6, 2607–2626, doi:10.5194/amt-6-2607-2013, 2013.
- de Foy, B., Lu, Z., Streets, D. G., Lamsal, L. N., and Duncan, B. N.: Estimates of power plant NO<sub>x</sub> emissions and lifetimes from OMI NO<sub>2</sub> satellite retrievals, *Atmos. Environ.*, 116, 1–11, 2015.

- Dirksen, R. J., Boersma, K. F., Eskes, H. J., Ionov, D. V., Bucsela, E. J., Levelt, P. F., and Kelder, H. M.: Evaluation of stratospheric NO<sub>2</sub> retrieved from the Ozone Monitoring Instrument: Intercomparison, diurnal cycle, and trending, *J. Geophys. Res.*, 116, D08305, doi:10.1029/2010JD014943, 2011.
- Fioletov, V. E., McLinden, C. A., Krotkov, N., Moran, M. D., and Yang, K.: Estimation of SO<sub>2</sub> emissions using OMI retrievals, *Geophys. Res. Lett.*, 38, L21811, doi:10.1029/2011gl049402, 2011.
- Jöckel, P., Tost, H., Pozzer, A., Kunze, M., Kirner, O., Brenninkmeijer, C. A. M., Brinkop, S., Cai, D. S., Dyroff, C., Eckstein, J., Frank, F., Garny, H., Gottschaldt, K. D., Graf, P., Grewe, V., Kerkweg, A., Kern, B., Matthes, S., Mertens, M., Meul, S., Neumaier, M., Nützel, M., Oberländer-Hayn, S., Ruhnke, R., Runde, T., Sander, R., Scharffe, D., and Zahn, A.: Earth System Chemistry Integrated Modelling (ESCiMo) with the Modular Earth Submodel System (MESSy, version 2.51), *Geosci. Model Dev. Discuss.*, 8, 8635–8750, doi:10.5194/gmdd-8-8635-2015, 2015.
- Lamsal, L. N., Martin, R. V., van Donkelaar, A., Celarier, E. A., Bucsela, E. J., Boersma, K. F., Dirksen, R., Luo, C., and Wang, Y.: Indirect validation of tropospheric nitrogen dioxide retrieved from the OMI satellite instrument: Insight into the seasonal variation of nitrogen oxides at northern midlatitudes, *J. Geophys. Res.*, 115, D05302, doi:10.1029/2009JD013351, 2010.
- Marchenko, S., Krotkov, N. A., Lamsal, L. N., Celarier, E. A., Swartz, W. H., and Bucsela, E. J.: Revising the slant column density retrieval of nitrogen dioxide observed by the Ozone Monitoring Instrument, *J. Geophys. Res.*, 120, 5670–5692, doi:10.1002/2014jd022913, 2015.
- Platt, U., and Stutz, J.: *Differential absorption spectroscopy*, Springer, Berlin and Heidelberg, Germany, 135–174, 2008.
- Russell, A. R., Perring, A. E., Valin, L. C., Bucsela, E. J., Browne, E. C., Wooldridge, P. J., and Cohen, R. C.: A high spatial resolution retrieval of NO<sub>2</sub> column densities from OMI: method and evaluation, *Atmos. Chem. Phys.*, 11, 8543–8554, doi:10.5194/acp-11-8543-2011, 2011.
- Valin, L. C., Russell, A. R., and Cohen, R. C.: Variations of OH radical in an urban plume inferred from NO<sub>2</sub> column measurements, *Geophys. Res. Lett.*, 40, 1856–1860, doi:10.1002/grl.50267, 2013.
- van Geffen, J. H. G. M., Boersma, K. F., Van Roozendaal, M., Hendrick, F., Mahieu, E., De Smedt, I., Snee, M., and Veefkind, J. P.: Improved spectral fitting of nitrogen dioxide from OMI in the 405–465 nm window, *Atmos. Meas. Tech.*, 8, 1685–1699, doi:10.5194/amt-8-1685-2015, 2015.
